# Supplementary material for: K63-linked ubiquitination regulates RIPK1 kinase activity to prevent cell death during embryogenesis and inflammation
Source: PubMed Central journal article supplement (PMC6744441; doi:10.1038/s41467-019-12033-8), 2019-09-13
Supplement: 41467_2019_12033_MOESM1_ESM.pdf [file 41467_2019_12033_MOESM1_ESM.pdf]

**Tang et al**, K63-linked ubiquitination regulates RIPK1 kinase activity to prevent cell death during embryogenesis and inflammation

**Supplementary Figures**

| Genotypes/<br>Embryo Stage          | E9.5 | E10.5 | E11.5 | E12.5 | E13.5 | E14.5 |
|-------------------------------------|------|-------|-------|-------|-------|-------|
| <i>Ripk1</i> <sup>+/+</sup>         | 2    | 4     | 12    | 10    | 12    | 15    |
| <i>Ripk1</i> <sup>K376R/+</sup>     | 5    | 8     | 24    | 18    | 22    | 28    |
| <i>Ripk1</i> <sup>K376R/K376R</sup> | 2    | 5     | 10    | 8     | 4     | 0     |
| Total                               | 9    | 17    | 46    | 36    | 38    | 43    |

**Supplementary Figure 1. *Ripk1*<sup>K376R/K376R</sup> mice are embryonic lethal at E13.5**

(a) Genotype analysis of offspring from *Ripk1*<sup>K376R/+</sup> intercrosses mice at different embryonic stage.

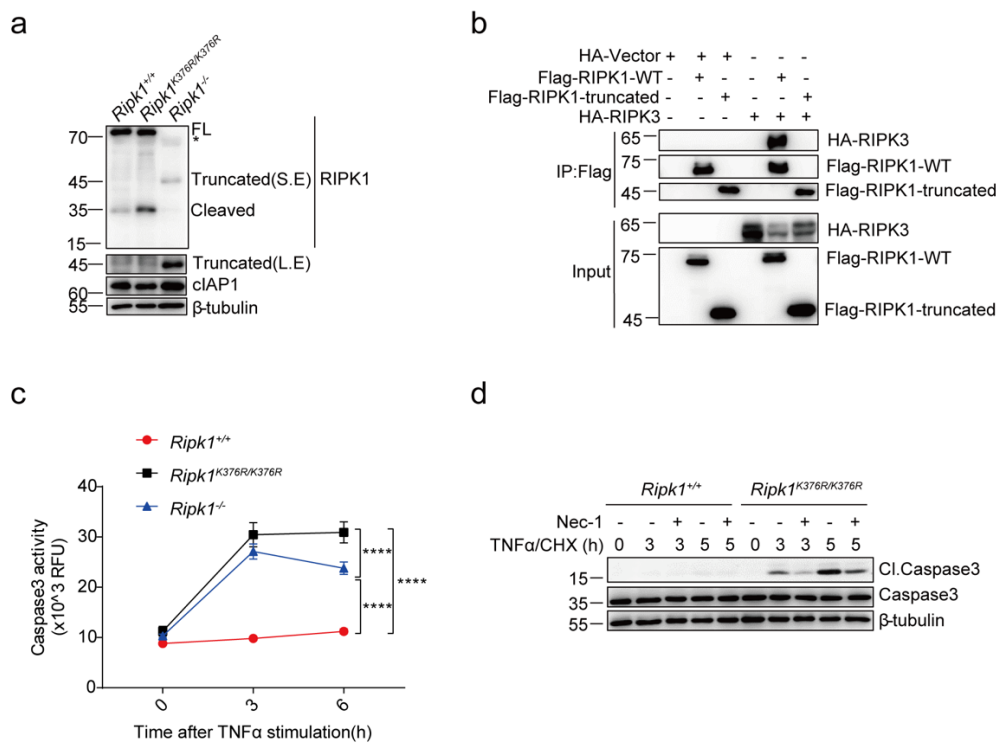

**Supplementary Figure 2. *Ripk1*<sup>K376R/K376R</sup> mutation sensitizes cells to apoptosis and necroptosis**

(a) Western-blotting detection of RIPK1 protein expression in primary MEFs from *Ripk1*<sup>+/+</sup>, *Ripk1*<sup>K376R/K376R</sup> and *Ripk1*<sup>-/-</sup> mice (\* refers to non-specific band). (b) Western-blotting analysis of immunoprecipitates using anti-Flag beads and total lysates of 293T cells transfected with the plasmids encoding Flag-RIPK1-WT, Flag-RIPK1-truncated and HA-RIPK3. (c) Caspase3 activity of *Ripk1*<sup>+/+</sup>, *Ripk1*<sup>K376R/K376R</sup> and *Ripk1*<sup>-/-</sup> immortalized MEFs treated with TNFα (40ng/ml) for different time point were measured by DEVD-AMC fluorescence, the error bars

represent mean±s.e.m of data from three independent cell samples for each genotype. **(d)** *Ripk1*<sup>+/+</sup> and *Ripk1*<sup>K376R/K376R</sup> immortalized MEFs were treated with TNF $\alpha$  (10ng/ml) /CHX (10ug/ml) with or without pre-treatment of Necrostatin-1 for the indicated time, and the cell lysates were analyzed by western-blotting using the indicated antibodies. Statistical significance was determined using a two-tailed unpaired *t* test, \*\*\*\**P* < 0.0001.

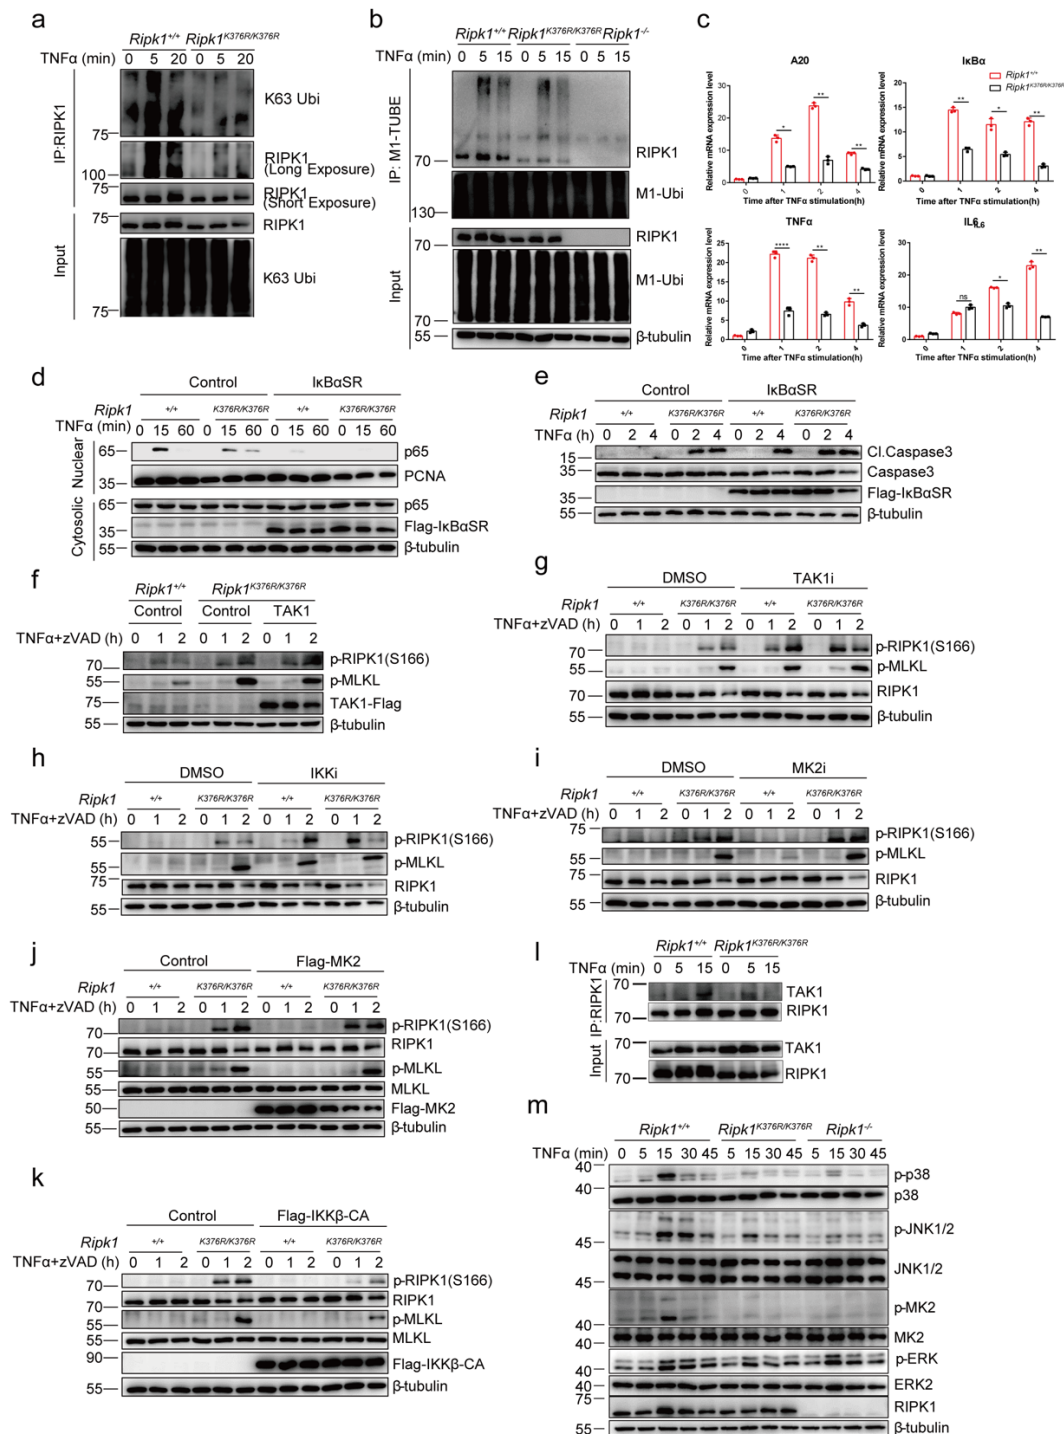

### Supplementary Figure 3. *Ripk1*<sup>K376R/K376R</sup> mutation increases RIPK1 kinase activity

**(a)** Immunoprecipitation of RIPK1 antibody in *Ripk1*<sup>+/+</sup> and *Ripk1*<sup>K376R/K376R</sup> immortalized MEFs treated for the indicated time with TNF $\alpha$  (20 ng/ml). The immunocomplexes were

analyzed by western-blotting with antibody against K63-linked ubiquitination chains. **(b)** Immortalized *Ripk1*<sup>+/+</sup>, *Ripk1*<sup>K376R/K376R</sup> and *Ripk1*<sup>-/-</sup> MEFs were treated for the indicated time with TNF $\alpha$  (20 ng/ml). The M1-ubiquitylated proteins were isolated by M1-TUBEs and analyzed by western-blotting. **(c)** RT-PCR analysis of NF- $\kappa$ B-targeting genes expression in *Ripk1*<sup>+/+</sup> or *Ripk1*<sup>K376R/K376R</sup> MEFs treated with TNF $\alpha$  (20 ng/ml) for the indicated time, the error bars represent mean $\pm$ s.e.m of data from three independent cell samples for each genotype. **(d)** Nuclear extracts were collected from *Ripk1*<sup>+/+</sup> and *Ripk1*<sup>K376R/K376R</sup> MEFs treated with TNF $\alpha$  (20 ng/ml) at indicated time with or without stably expressed Flag-tagged I $\kappa$ B $\alpha$ -SR and analyzed by western-blotting with antibodies against p65 and PCNA. **(e)** *Ripk1*<sup>+/+</sup> and *Ripk1*<sup>K376R/K376R</sup> immortalized MEFs that stably expressed with the Flag-tagged I $\kappa$ B $\alpha$ -SR were stimulated with TNF $\alpha$  (40 ng/ml) for different periods of time. The cell lysates were analyzed by western-blotting with indicated antibodies. **(f,j,k)** *Ripk1*<sup>+/+</sup> and *Ripk1*<sup>K376R/K376R</sup> immortalized MEFs that expressed with the Flag-tagged TAK1**(f)** , Flag-tagged MK2**(j)** or Flag-IKK $\beta$ -CA**(k)** were stimulated with TNF $\alpha$  (20 ng/ml) plus zVAD.fmk (10  $\mu$ M) for different periods of time. The cell lysates were analyzed by western-blotting with indicated antibodies. **(g-i)** *Ripk1*<sup>+/+</sup> and *Ripk1*<sup>K376R/K376R</sup> immortalized MEFs were stimulated with TNF $\alpha$  (20 ng/ml) plus zVAD.fmk (10  $\mu$ M) for different periods of time with or without pre-treatment of TAK1 inhibitor**(g)**, IKK inhibitor**(h)**, MK2 inhibitor**(i)**, The cell lysates were analyzed by western-blotting with indicated antibodies. **(l)** Immunoprecipitation of RIPK1 antibody in *Ripk1*<sup>+/+</sup> and *Ripk1*<sup>K376R/K376R</sup> immortalized MEFs treated for the indicated time with TNF $\alpha$  (20 ng/ml). The immunocomplexes were analyzed by western-blotting with antibody against TAK1. **(m)** Immortalized *Ripk1*<sup>+/+</sup>, *Ripk1*<sup>K376R/K376R</sup> and *Ripk1*<sup>-/-</sup> MEFs were treated for the indicated time with TNF $\alpha$  (20 ng/ml). The cell lysates were analyzed by western-blotting with indicated antibodies. Statistical significance was determined using a two-tailed unpaired *t* test, ns P > 0.05, \*P < 0.05, \*\*P < 0.01, \*\*\*\*P < 0.0001.

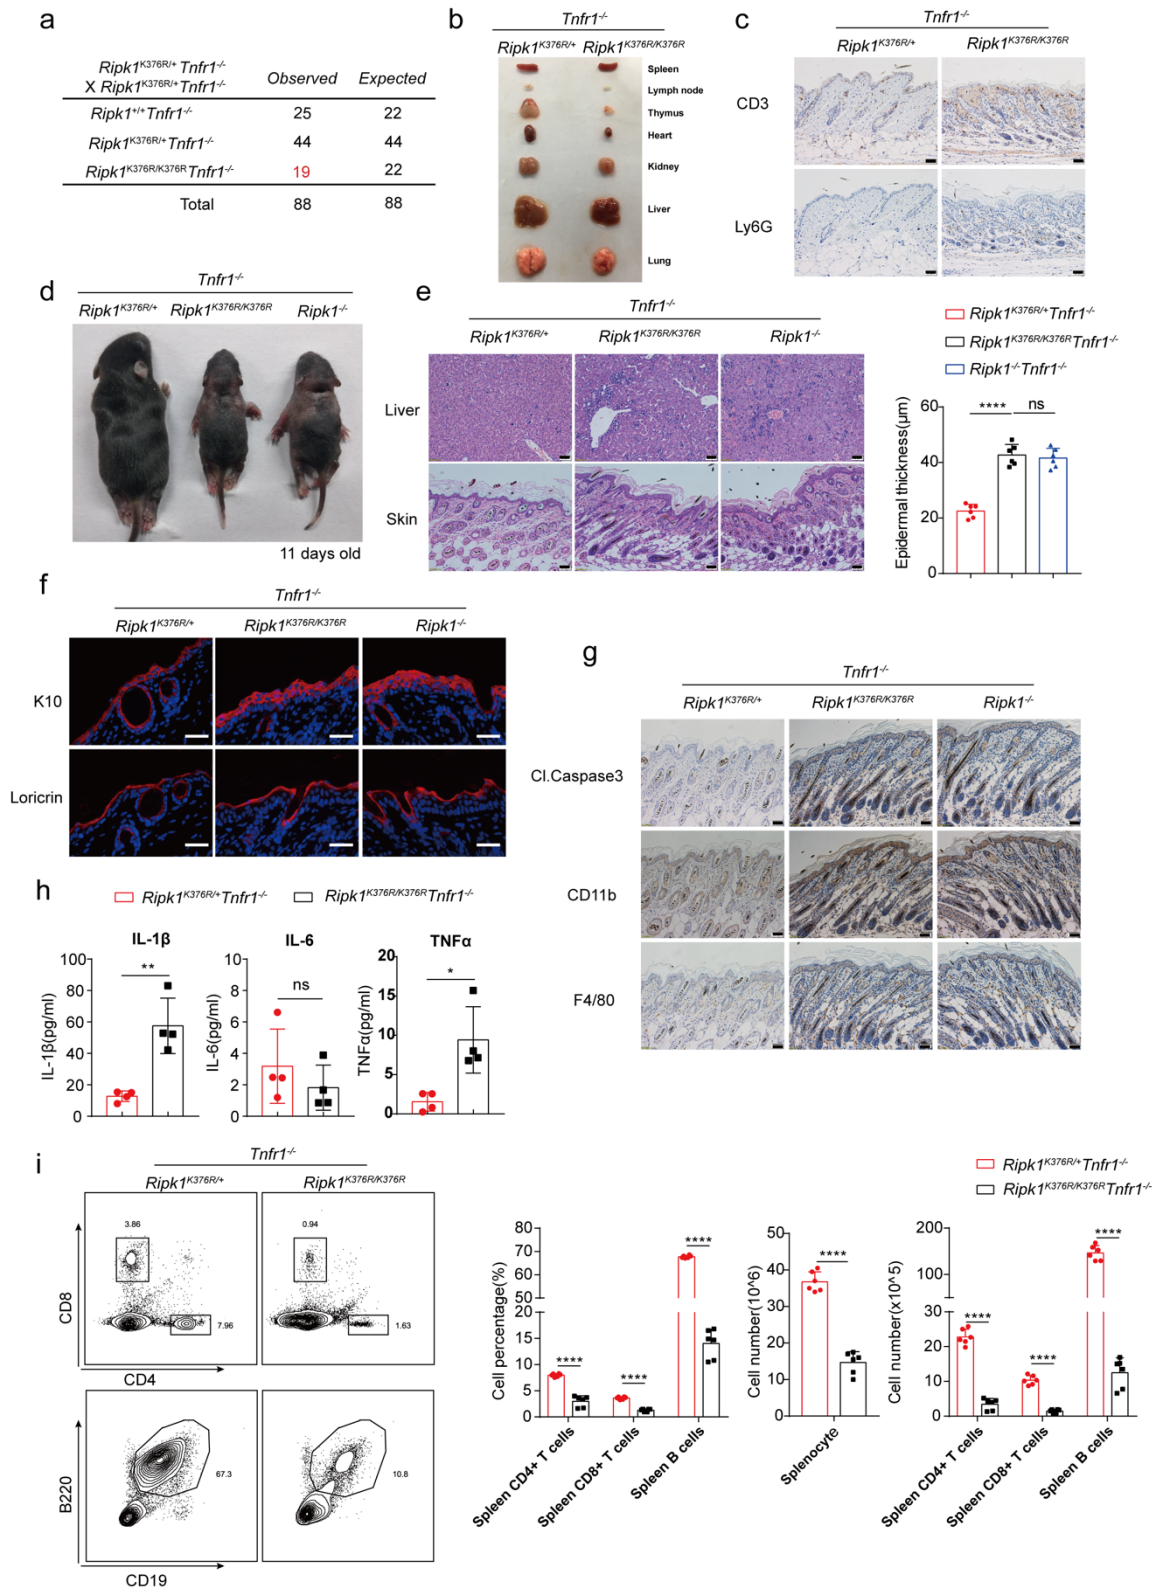

**Supplementary Figure 4. TNFR1 deficiency partially delay the lethality of *Ripk1*<sup>K376R/K376R</sup> mice**

(a) Statistical analysis of the expected and observed offspring mice (11-days-old) from the intercrosses of *Ripk1*<sup>K376R/+</sup> *Tnfr1*<sup>-/-</sup> mice. (b) Representative macroscopic images of organs with

indicated genotypes at P11. (c) Immunohistochemical staining of CD3 and Ly6G in skin sections of *Ripk1*<sup>K376R/K376R</sup>*Tnfr1*<sup>-/-</sup> and *Ripk1*<sup>K376R/+</sup>*Tnfr1*<sup>-/-</sup> littermate mice at P11 (scale bar, 50  $\mu$ m). (d) Representative macroscopic images of *Ripk1*<sup>K376R/+</sup>*Tnfr1*<sup>-/-</sup>, *Ripk1*<sup>K376R/K376R</sup>*Tnfr1*<sup>-/-</sup> and *Ripk1*<sup>-/-</sup>*Tnfr1*<sup>-/-</sup> mice at P11. (e) H&E staining of liver and skin sections of *Ripk1*<sup>K376R/+</sup>*Tnfr1*<sup>-/-</sup>, *Ripk1*<sup>K376R/K376R</sup>*Tnfr1*<sup>-/-</sup> and *Ripk1*<sup>-/-</sup>*Tnfr1*<sup>-/-</sup> mice at P11 (scale bar, 50  $\mu$ m), and microscopic quantification of the epidermal thickness from H&E results (*Ripk1*<sup>K376R/+</sup>*Tnfr1*<sup>-/-</sup> mice: n=6; *Ripk1*<sup>K376R/K376R</sup>*Tnfr1*<sup>-/-</sup> mice: n=6; *Ripk1*<sup>-/-</sup>*Tnfr1*<sup>-/-</sup> mice: n=6). (f-g) Immunofluorescence staining of Loricrin and K10 (scale bar, 100  $\mu$ m) (f) or immunohistochemical staining of F4/80, CD11b, and cleaved Caspase3 (scale bar, 50  $\mu$ m) (g) in skin sections of *Ripk1*<sup>K376R/+</sup>*Tnfr1*<sup>-/-</sup>, *Ripk1*<sup>K376R/K376R</sup>*Tnfr1*<sup>-/-</sup> and *Ripk1*<sup>-/-</sup>*Tnfr1*<sup>-/-</sup> mice at P11. (h) Cytokines in lung homogenates were determined with the indicated genotypes at P11 (*Ripk1*<sup>K376R/+</sup>*Tnfr1*<sup>-/-</sup> mice: n=4; *Ripk1*<sup>K376R/K376R</sup>*Tnfr1*<sup>-/-</sup> mice: n=4). (i) Flow cytometry and statistical results of CD4<sup>+</sup>, CD8<sup>+</sup> T cells and CD19<sup>+</sup>B220<sup>+</sup> B cells in spleen from *Ripk1*<sup>K376R/K376R</sup>*Tnfr1*<sup>-/-</sup> and *Ripk1*<sup>K376R/+</sup>*Tnfr1*<sup>-/-</sup> littermate mice at P11 (*Ripk1*<sup>K376R/+</sup>*Tnfr1*<sup>-/-</sup> mice: n=6; *Ripk1*<sup>K376R/K376R</sup>*Tnfr1*<sup>-/-</sup> mice: n=6). In (e, h, i), data are mean  $\pm$  s.e.m. Statistical significance was determined using a two-tailed unpaired *t* test, ns *P* > 0.05, \**P* < 0.05, \*\**P* < 0.01, \*\*\*\**P* < 0.0001.

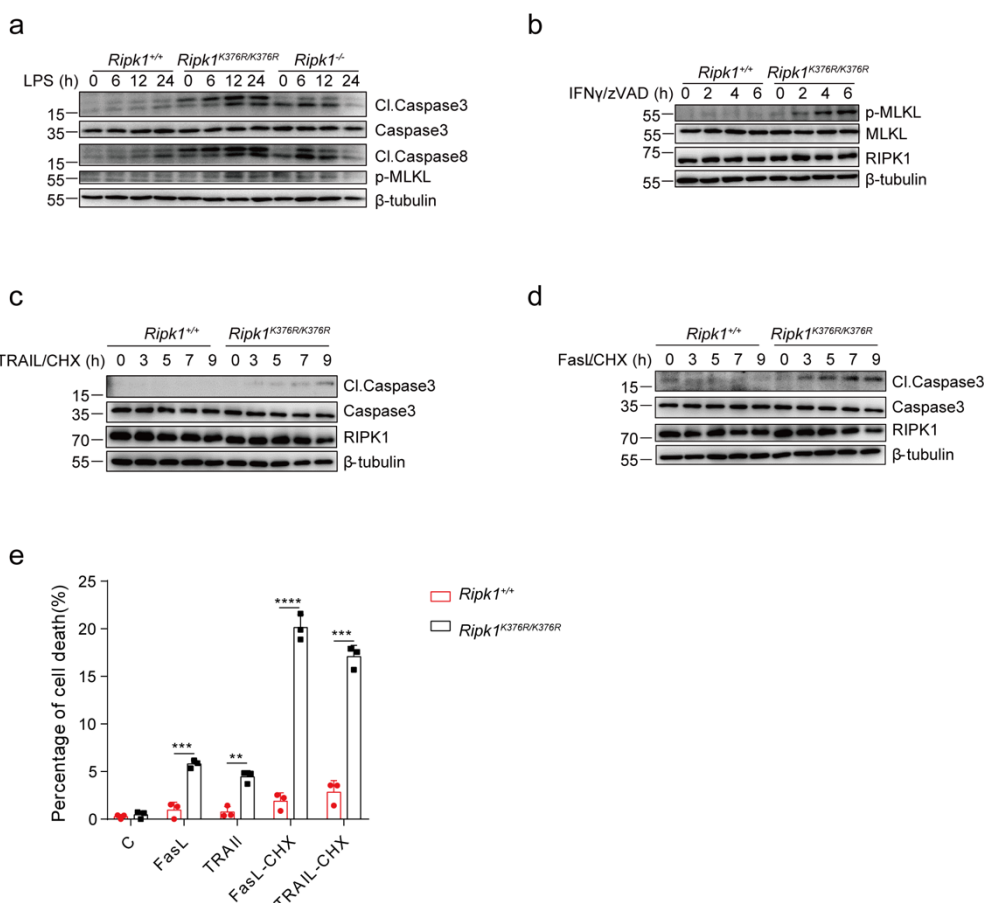

### Supplementary Figure 5. Other signaling such as IFNs also contributes to lethality of *Ripk1*<sup>K376R/K376R</sup> mice

(a-d) *Ripk1*<sup>+/+</sup>, *Ripk1*<sup>K376R/K376R</sup> and *Ripk1*<sup>-/-</sup> immortalized MEFs were treated with LPS (100 ng/ml) (a), IFN $\gamma$ /zVAD (IFN $\gamma$ : 10  $\mu$ g/ml; zVAD.fmk: 20  $\mu$ M) (b), TRAIL/CHX

(TRAIL:150ng/ml; CHX:10 ug/ml) (c) and FasL/CHX (FasL: 0.5ug/ml; CHX:10ug/ml) (d) for the indicated time. The cell lysates were analyzed by western-blotting using the indicated antibodies. (e) Cell death of *Ripk1*<sup>+/+</sup> and *Ripk1*<sup>K376R/K376R</sup> immortalized MEFs treated for 12h with different stimulators were measured by SytoxGreen positivity. FasL: 0.5ug/ml; TRAIL:150ng/ml; C: CHX (10ug/ml), the error bars represent mean±s.e.m of data from three independent cell samples for each genotype. Statistical significance was determined using a two-tailed unpaired *t* test, \*\**P* < 0.01, \*\*\**P* < 0.01, \*\*\*\**P* < 0.0001.

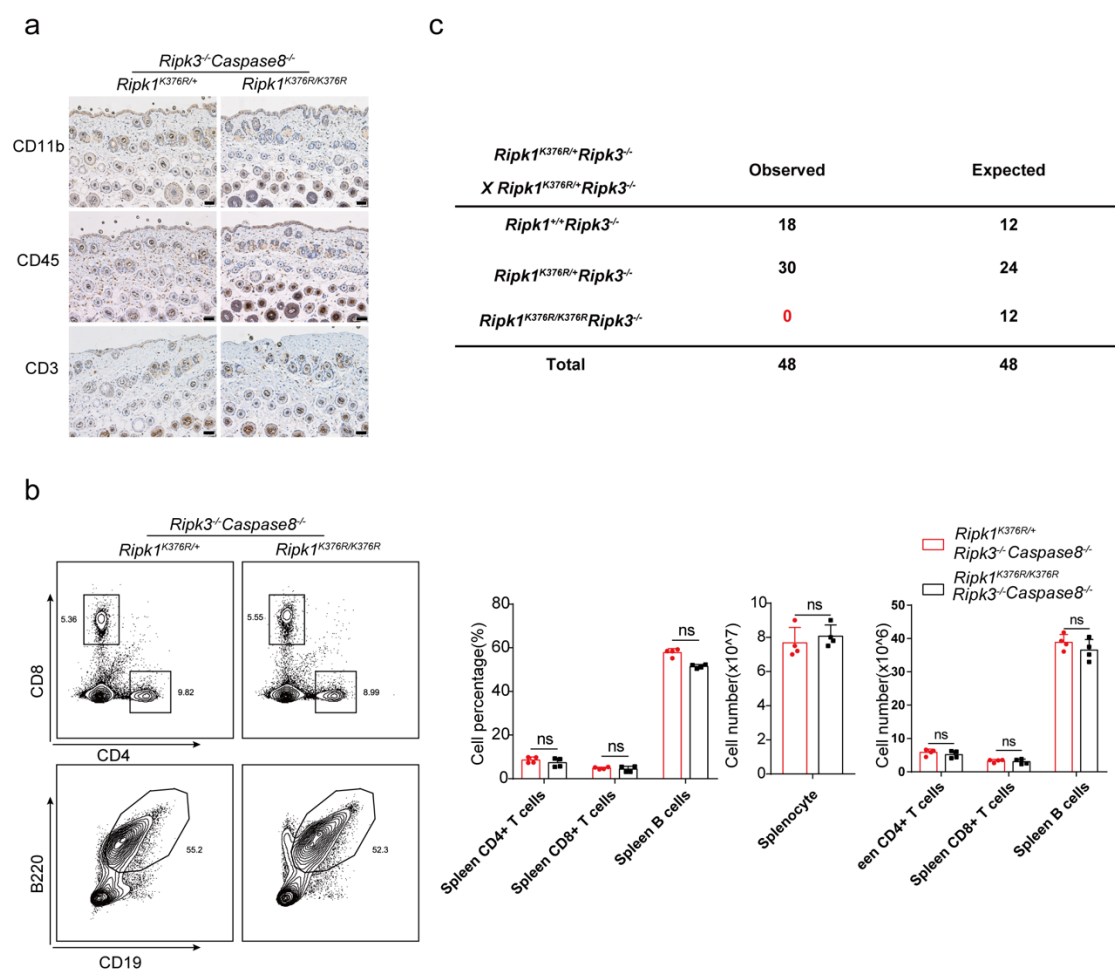

### Supplementary Figure 6. Co-deletion of RIPK3 and Caspase8 fully rescue the phenotype of *Ripk1*<sup>K376R/K376R</sup> mice

(a) Immunohistochemical staining of CD11b, CD45 and CD3 staining in skin sections of *Ripk1*<sup>K376R/K376R</sup>*Ripk3*<sup>-/-</sup>*Caspase8*<sup>-/-</sup> and *Ripk1*<sup>K376R/+</sup>*Ripk3*<sup>-/-</sup>*Caspase8*<sup>-/-</sup> littermate mice at P40 (scale bar, 50  $\mu$ m). (b) Flow cytometry and statistical results of CD4<sup>+</sup>, CD8<sup>+</sup> T cells and CD19<sup>+</sup>B220<sup>+</sup> B cells in spleen from *Ripk1*<sup>K376R/K376R</sup>*Ripk3*<sup>-/-</sup>*Caspase8*<sup>-/-</sup> and *Ripk1*<sup>K376R/+</sup>*Ripk3*<sup>-/-</sup>*Caspase8*<sup>-/-</sup> littermate mice at P40 (*Ripk1*<sup>K376R/+</sup>*Ripk3*<sup>-/-</sup>*Caspase8*<sup>-/-</sup> mice: n=4; *Ripk1*<sup>K376R/K376R</sup>*Ripk3*<sup>-/-</sup>*Caspase8*<sup>-/-</sup> mice: n=4). (c) Statistical analysis of the expected and observed offspring mice (11-days-old) from the intercrosses of *Ripk1*<sup>K376R/+</sup>*Ripk3*<sup>-/-</sup> mice. In (b), data are mean± s.e.m. Statistical significance was determined using a two-tailed unpaired *t* test, ns *P* > 0.05.

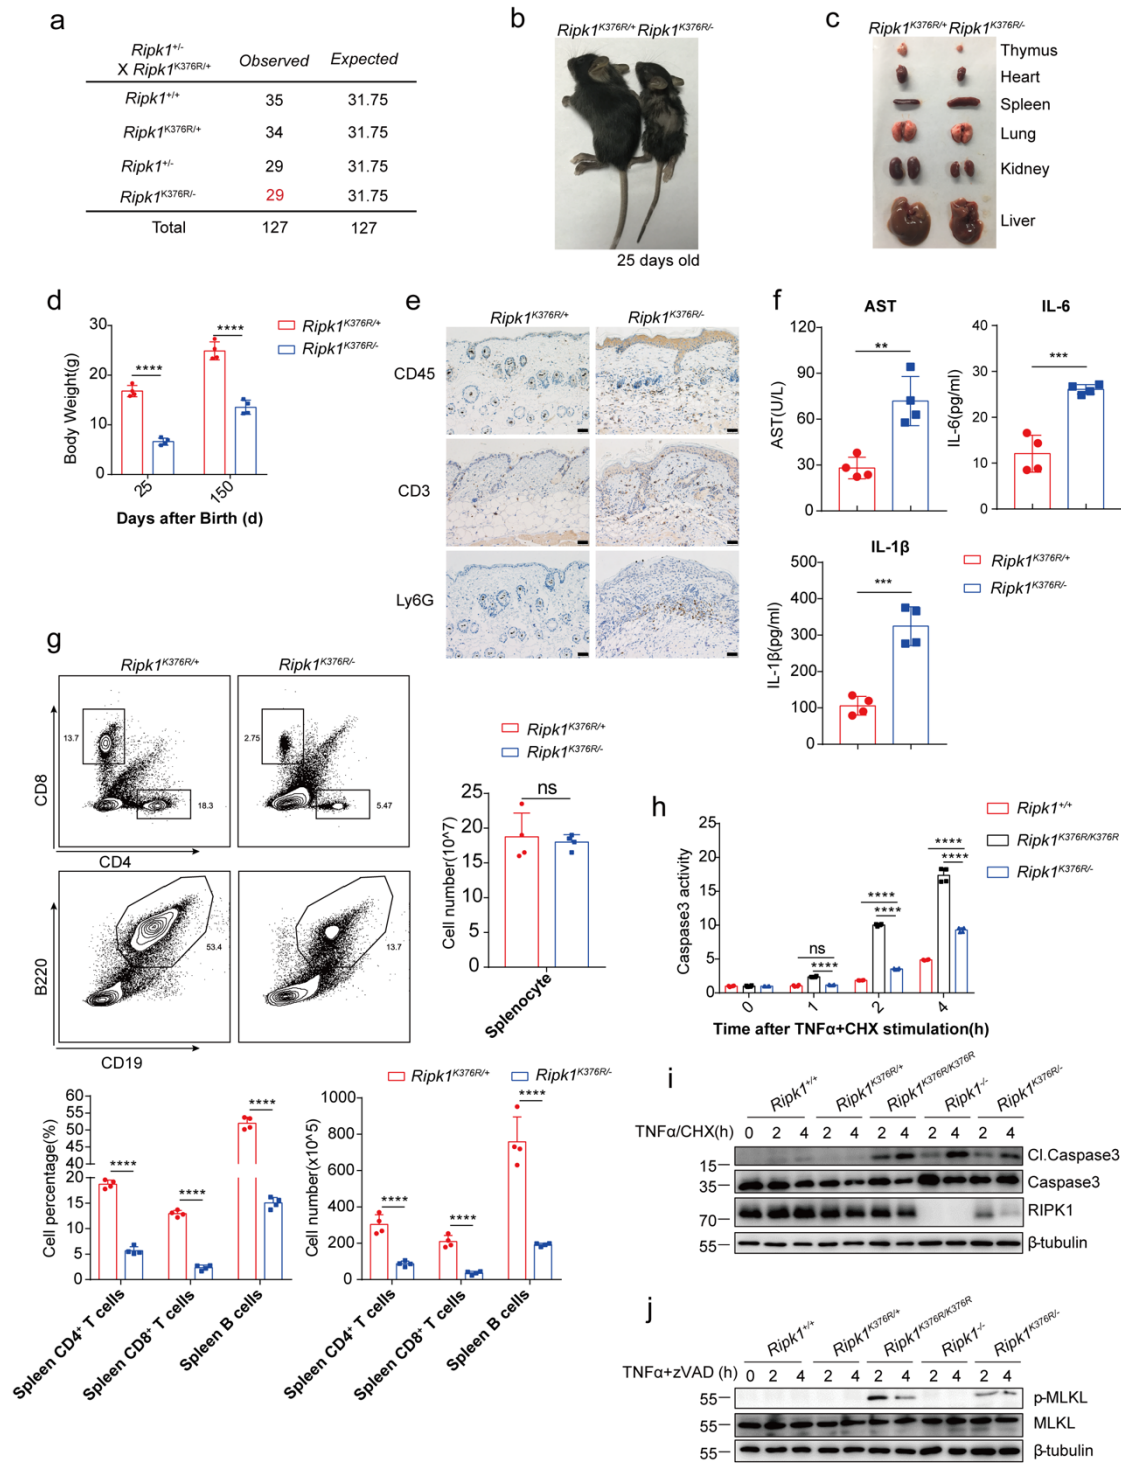

### Supplementary Figure 7. *Ripk1*<sup>K376R/-</sup> mice develops spontaneous inflammation

(a) Statistical analysis of the expected and observed offspring mice (21-days-old) from the intercrosses of *Ripk1*<sup>K376R/+</sup> and *Ripk1*<sup>+/-</sup> mice. (b) Representative macroscopic images of *Ripk1*<sup>K376R/-</sup> and *Ripk1*<sup>K376R/+</sup> littermate mice at P25. (c) Representative macroscopic images of organs with indicated genotypes at P150. (d) Statistical analysis of body weight of *Ripk1*<sup>K376R/+</sup> and *Ripk1*<sup>K376R/-</sup> littermate mice at P25 and P150 (*Ripk1*<sup>K376R/+</sup> mice: n=4; *Ripk1*<sup>K376R/-</sup> mice: n=4). (e) Immunohistochemical staining of CD45, CD3 and Ly6G in skin sections of *Ripk1*<sup>K376R/-</sup> and

*Ripk1*<sup>K376R/+</sup> littermate mice at P150 (scale bar, 50 μm). (f) AST in blood and cytokines in liver homogenates were determined with the indicated genotypes at P150 (*Ripk1*<sup>K376R/+</sup> mice: n=4; *Ripk1*<sup>K376R/-</sup> mice: n=4). (g) Flow cytometry and statistical results of CD4<sup>+</sup>, CD8<sup>+</sup> T cells and CD19<sup>+</sup>B220<sup>+</sup> B cells in spleen from *Ripk1*<sup>K376R/+</sup> and *Ripk1*<sup>K376R/-</sup> littermate mice at P150 (*Ripk1*<sup>K376R/+</sup> mice: n=4; *Ripk1*<sup>K376R/-</sup> mice: n=4). (h) Caspase3 activity of *Ripk1*<sup>+/+</sup>, *Ripk1*<sup>K376R/-</sup> and *Ripk1*<sup>K376R/K376R</sup> immortalized MEFs treated with TNFα/CHX (TNFα: 20 ng/ml; CHX: 10 μg/ml) for the indicated time was measured by DEVD-AMC fluorescence, the error bars represent mean±s.e.m of data from three independent cell samples for each genotype. (i-j) *Ripk1*<sup>+/+</sup>, *Ripk1*<sup>K376R/+</sup>, *Ripk1*<sup>K376R/K376R</sup>, *Ripk1*<sup>-/-</sup> and *Ripk1*<sup>K376R/-</sup> immortalized MEFs were treated with TNFα (20 ng/ml)/CHX (10 μg/ml) (i) and TNFα (20 ng/ml)/zVAD.fmk (10 μM) (j) for the indicated time, and the cell lysates were analyzed by western-blotting using the indicated antibodies. In (d-h), data are mean± s.e.m. Statistical significance was determined using a two-tailed unpaired *t* test, ns *P* > 0.05, \*\**P* < 0.01, \*\*\**P* < 0.001, \*\*\*\**P* < 0.0001.

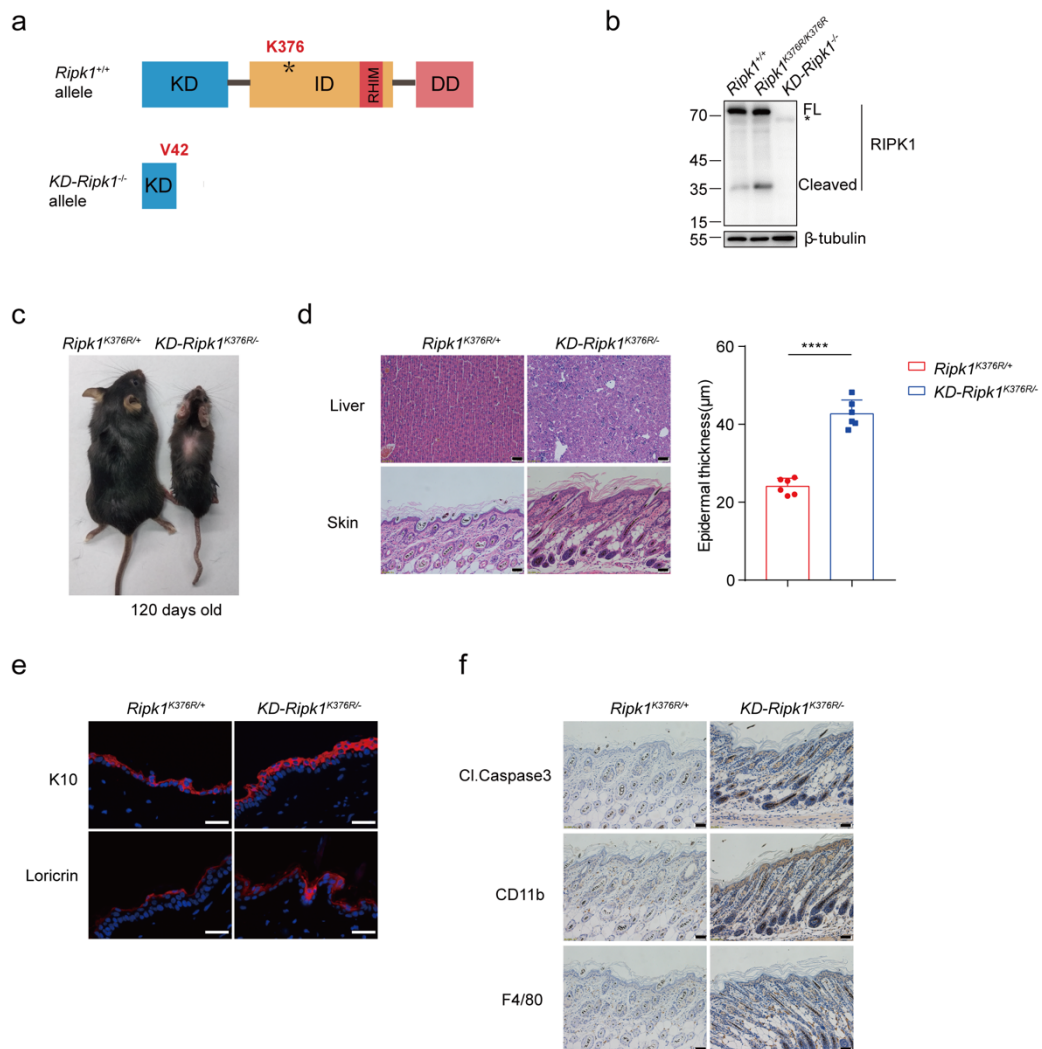

### Supplementary Figure 8. *KD-Ripk1*<sup>K376R/-</sup> mice develop spontaneous inflammation

(a) Schematic overview of domain structure of *Ripk1*<sup>K376R/K376R</sup> and *KD-Ripk1*<sup>-/-</sup> mice. KD, kinase domain; ID, intermediate domain; DD, death domain; RHIM, RIP homotypic interaction motif. (b) Western-blotting detection of RIPK1 protein expression in primary MEFs from



*Ripk1*<sup>+/+</sup> and *KD-Ripk1*<sup>-/-</sup> mice (\*refers to non-specific band). (c) Representative macroscopic images of *Ripk1*<sup>K376R/+</sup> and *KD-Ripk1*<sup>K376R/-</sup> littermate mice at P120. (d) H&E staining of liver and skin sections of *Ripk1*<sup>K376R/+</sup> and *KD-Ripk1*<sup>K376R/-</sup> littermate mice at P120 (scale bar, 50  $\mu$ m), and microscopic quantification of the epidermal thickness from H&E results (*Ripk1*<sup>K376R/+</sup> mice: n=4; *KD-Ripk1*<sup>K376R/-</sup> mice: n=4). (e-f) Immunofluorescence staining of Loricrin and K10 (scale bar, 100  $\mu$ m) (e) or immunohistochemical staining of F4/80, CD11b, and cleaved Caspase3 (scale bar, 50  $\mu$ m) (f) in skin sections of *Ripk1*<sup>K376R/+</sup> and *KD-Ripk1*<sup>K376R/-</sup> littermate mice at P120. In (d), data are mean  $\pm$  s.e.m. Statistical significance was determined using a two-tailed unpaired *t* test, \*\*\*\*P < 0.0001.

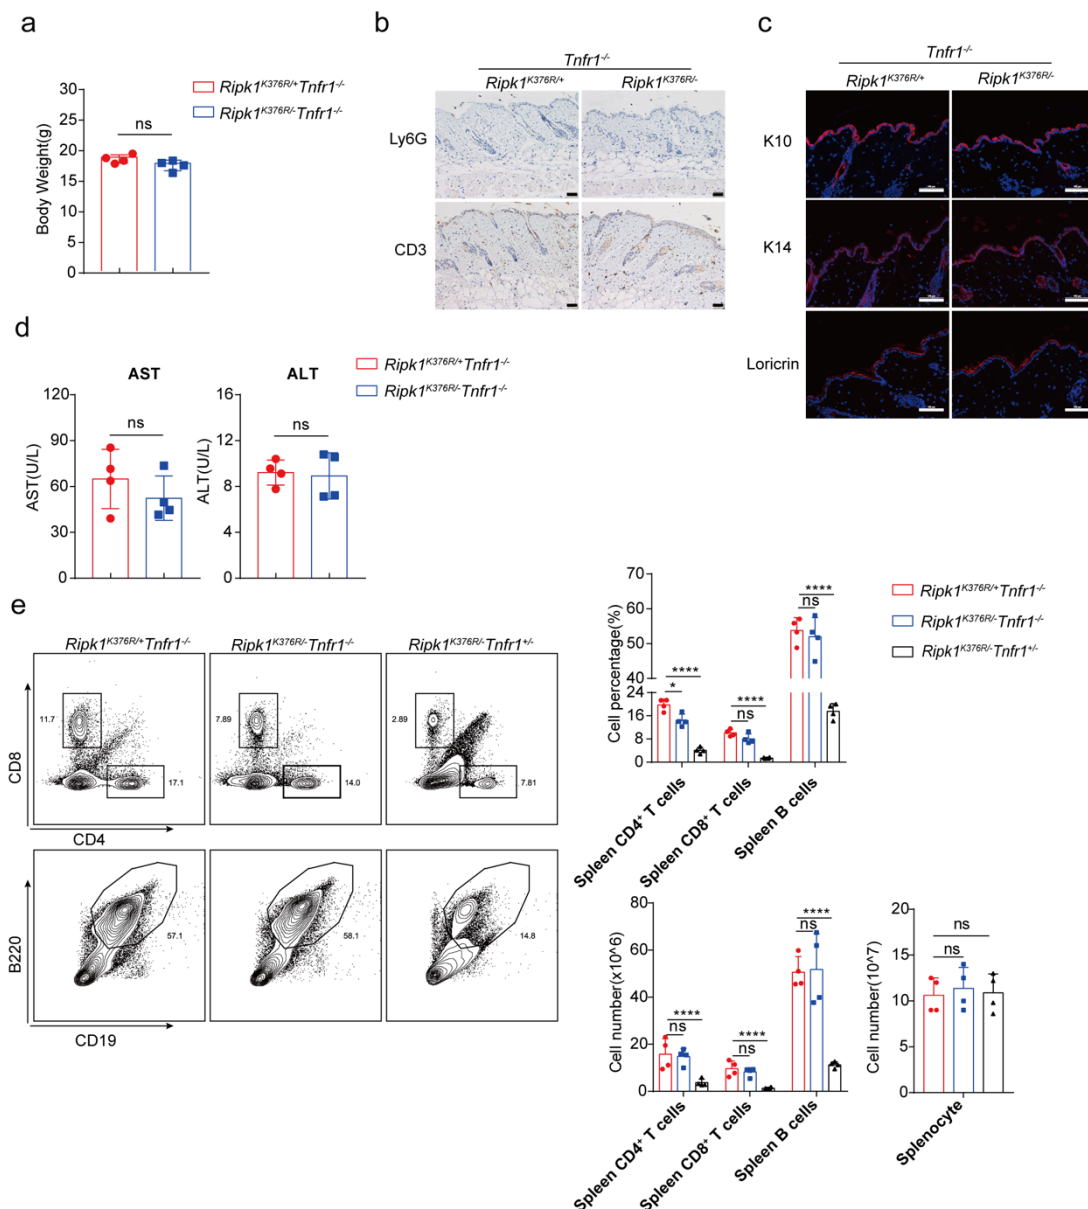

**Supplementary Figure 9. TNFR1 deficiency suppress inflammation in *Ripk1*<sup>K376R/-</sup> mice** (a) Statistical analysis of body weight of *Ripk1*<sup>K376R/-</sup>*Tnfr1*<sup>-/-</sup> and *Ripk1*<sup>K376R/+</sup>*Tnfr1*<sup>-/-</sup> littermate mice at P40 (*Ripk1*<sup>K376R/+</sup>*Tnfr1*<sup>-/-</sup> mice: n=4; *Ripk1*<sup>K376R/-</sup>*Tnfr1*<sup>-/-</sup> mice: n=4). (b) Immunohistochemical staining of CD3 and Ly6G in skin sections of *Ripk1*<sup>K376R/-</sup>*Tnfr1*<sup>-/-</sup> and *Ripk1*<sup>K376R/+</sup>*Tnfr1*<sup>-/-</sup>

littermate mice at P40(scale bar,50  $\mu\text{m}$ ). (c) Immunofluorescence staining of Loricrin, K10, and K14 in skin sections of *Ripk1*<sup>K376R/-</sup>*Tnfr1*<sup>-/-</sup> and *Ripk1*<sup>K376R/+</sup>*Tnfr1*<sup>-/-</sup> littermate mice at P40(scale bar,100  $\mu\text{m}$ ). (d) AST and ALT in blood were determined with the indicated genotypes at P40(*Ripk1*<sup>K376R/+</sup>*Tnfr1*<sup>-/-</sup> mice: n=4; *Ripk1*<sup>K376R/-</sup>*Tnfr1*<sup>-/-</sup> mice: n=4). (e) Flow cytometry and statistical results of CD4<sup>+</sup>, CD8<sup>+</sup> T cells and CD19<sup>+</sup>B220<sup>+</sup> B cells in spleen from *Ripk1*<sup>K376R/-</sup>*Tnfr1*<sup>-/-</sup>, *Ripk1*<sup>K376R/-</sup>*Tnfr1*<sup>+/-</sup> and *Ripk1*<sup>K376R/+</sup>*Tnfr1*<sup>-/-</sup> littermate mice at P150(*Ripk1*<sup>K376R/+</sup>*Tnfr1*<sup>-/-</sup> mice: n=4; *Ripk1*<sup>K376R/-</sup>*Tnfr1*<sup>+/-</sup> mice: n=4; *Ripk1*<sup>K376R/-</sup>*Tnfr1*<sup>-/-</sup> mice: n=4). In (a, d, e), data are mean  $\pm$  s.e.m. Statistical significance was determined using a two-tailed unpaired *t* test, ns *P* > 0.05, \**P* < 0.05, \*\**P* < 0.01, \*\*\*\**P* < 0.0001.

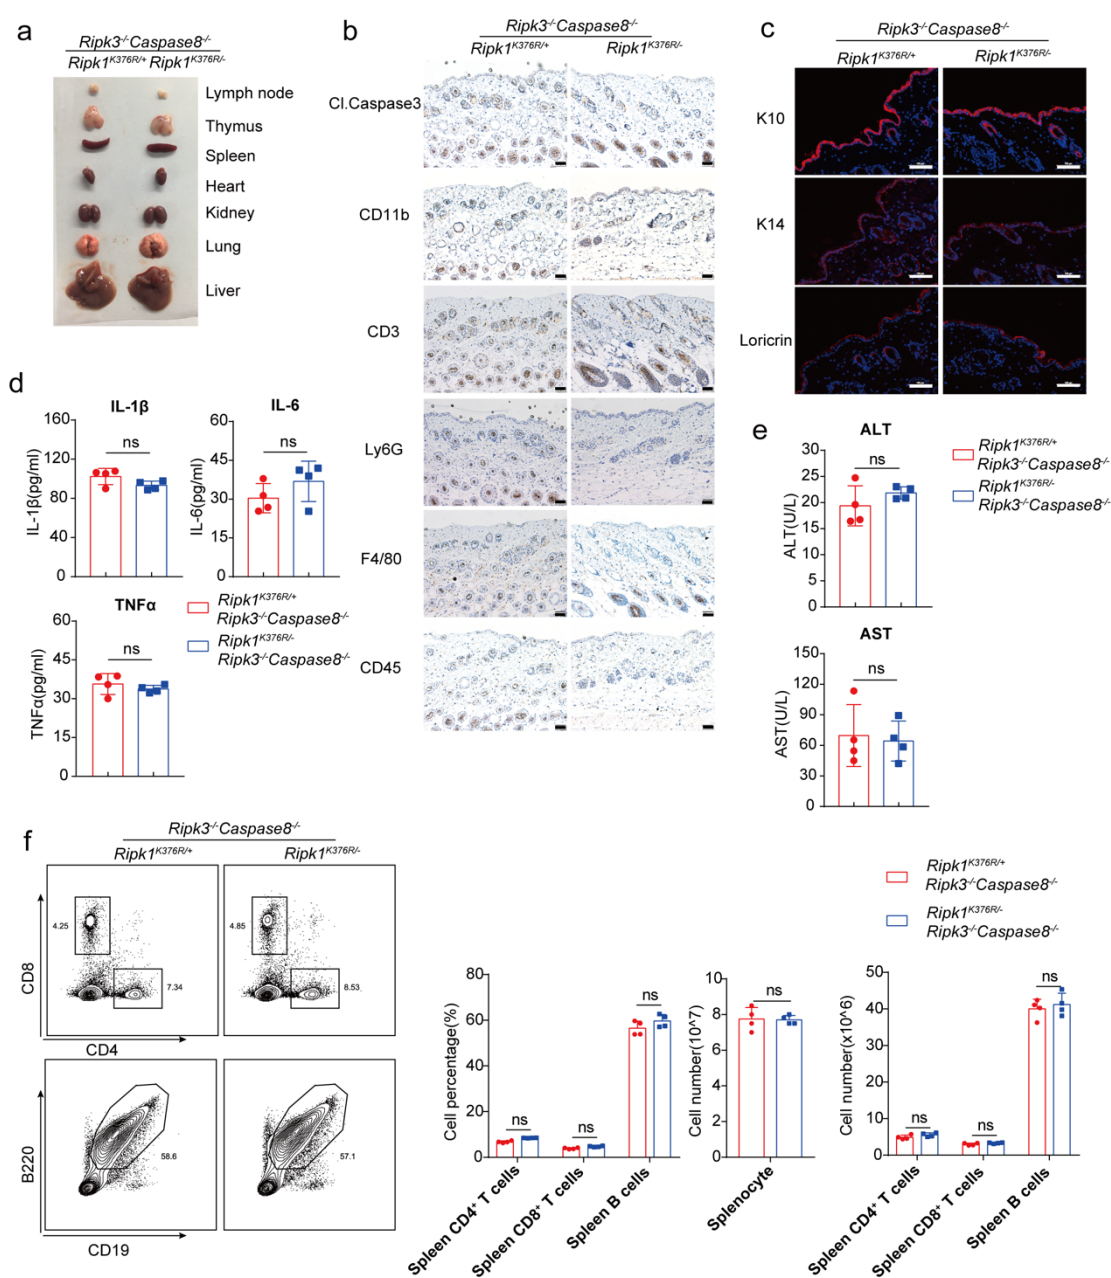

**Supplementary Figure 10. Co-deletion of RIPK3 and Caspase8 suppress inflammation in *Ripk1*<sup>K376R/-</sup> mice**

(a) Representative macroscopic images of organs with indicated genotypes at P40. (b) Immunohistochemical staining of cleaved Caspase3, CD11b, CD3, Ly6G, F4/80 and CD45 in skin sections of *Ripk1*<sup>K376R/+</sup>*Ripk3*<sup>-/-</sup> *Caspase8*<sup>-/-</sup> and *Ripk1*<sup>K376R/+</sup>*Ripk3*<sup>-/-</sup> *Caspase8*<sup>-/-</sup> littermate mice at P40(scale bar,50  $\mu$ m). (c) Immunofluorescence staining of Loricrin, K10, and K14 in skin sections of *Ripk1*<sup>K376R/+</sup>*Ripk3*<sup>-/-</sup> *Caspase8*<sup>-/-</sup> and *Ripk1*<sup>K376R/+</sup>*Ripk3*<sup>-/-</sup> *Caspase8*<sup>-/-</sup> littermate mice at P40(scale bar,100  $\mu$ m). (d) Cytokines in liver homogenates were determined with the indicated genotypes at P40 (*Ripk1*<sup>K376R/+</sup>*Ripk3*<sup>-/-</sup> *Caspase8*<sup>-/-</sup> mice: n=4; *Ripk1*<sup>K376R/+</sup>*Ripk3*<sup>-/-</sup> *Caspase8*<sup>-/-</sup> mice: n=4). (e) AST and ALT in blood were determined with the indicated genotypes at P40(*Ripk1*<sup>K376R/+</sup>*Ripk3*<sup>-/-</sup> *Caspase8*<sup>-/-</sup> mice: n=4; *Ripk1*<sup>K376R/+</sup>*Ripk3*<sup>-/-</sup> *Caspase8*<sup>-/-</sup> mice: n=4). (f) Flow cytometry and statistical results of CD4<sup>+</sup>, CD8<sup>+</sup> T cells and CD19<sup>+</sup>B220<sup>+</sup> B cells in spleen from *Ripk1*<sup>K376R/+</sup>*Ripk3*<sup>-/-</sup> *Caspase8*<sup>-/-</sup> and *Ripk1*<sup>K376R/+</sup>*Ripk3*<sup>-/-</sup> *Caspase8*<sup>-/-</sup> littermate mice at P40(*Ripk1*<sup>K376R/+</sup>*Ripk3*<sup>-/-</sup> *Caspase8*<sup>-/-</sup> mice: n=4; *Ripk1*<sup>K376R/+</sup>*Ripk3*<sup>-/-</sup> *Caspase8*<sup>-/-</sup> mice: n=4). In (d, e, f), data are mean  $\pm$  s.e.m. Statistical significance was determined using a two-tailed unpaired *t* test, ns *P* > 0.05.

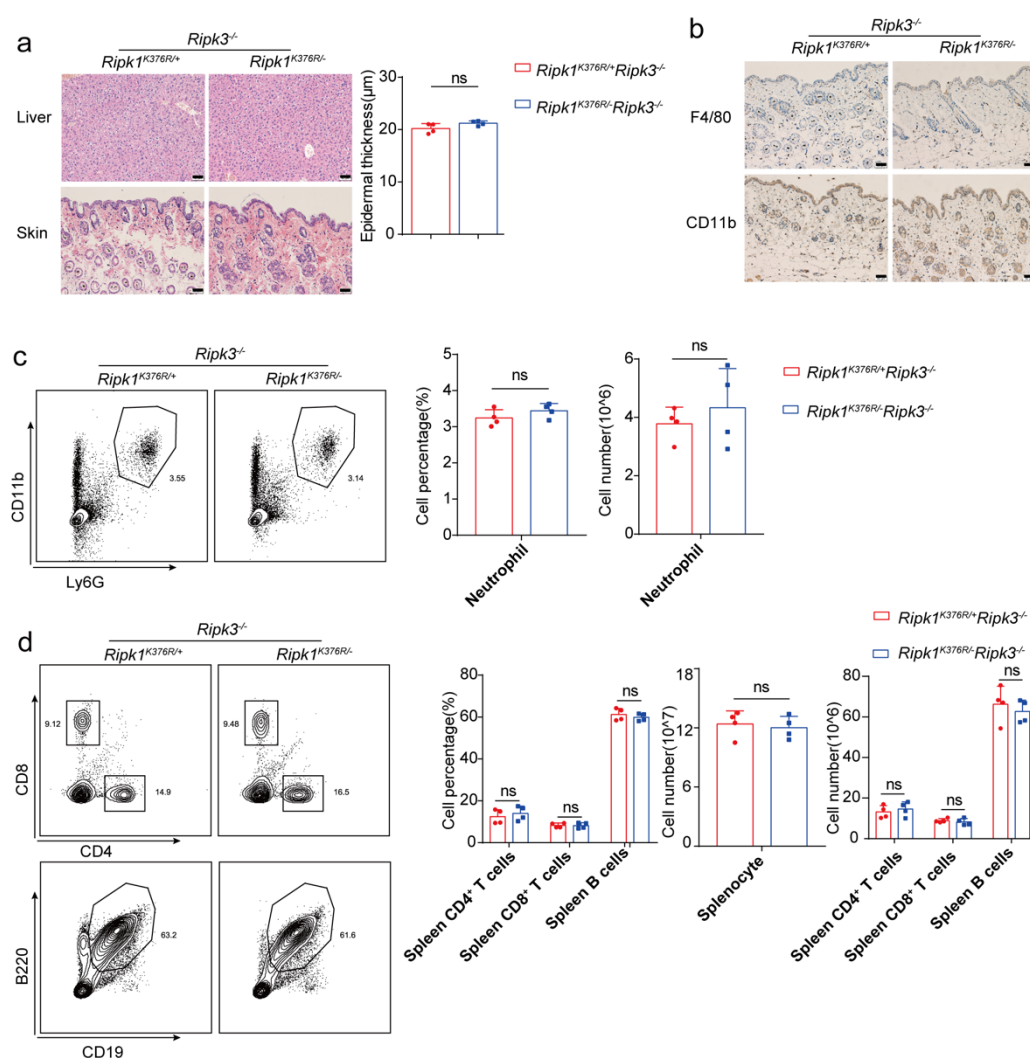

**Supplementary Figure 11. RIPK3 deletion suppress inflammation in *Ripk1*<sup>K376R/-</sup> mice**  
 (a) H&E staining of liver and skin sections of *Ripk1*<sup>K376R/-</sup>*Ripk3*<sup>-/-</sup> and *Ripk1*<sup>K376R/+</sup>*Ripk3*<sup>-/-</sup> littermate mice at P40(scale bar,50  $\mu$ m), and microscopic quantification of the epidermal

thickness from H&E results (*Ripk1*<sup>K376R/+</sup>*Ripk3*<sup>-/-</sup> mice: n=4; *Ripk1*<sup>K376R/-</sup>*Ripk3*<sup>-/-</sup> mice: n=4). **(b)** Immunohistochemical staining of CD11b and F4/80 in skin sections of *Ripk1*<sup>K376R/-</sup>*Ripk3*<sup>-/-</sup> and *Ripk1*<sup>K376R/+</sup>*Ripk3*<sup>-/-</sup> littermate mice at P40 (scale bar, 50  $\mu$ m). **(c)** Flow cytometry and statistical results of splenocytes stained with Ly6G and CD11b from *Ripk1*<sup>K376R/-</sup>*Ripk3*<sup>-/-</sup> and *Ripk1*<sup>K376R/+</sup>*Ripk3*<sup>-/-</sup> littermate mice at P40 (*Ripk1*<sup>K376R/+</sup>*Ripk3*<sup>-/-</sup> mice: n=4; *Ripk1*<sup>K376R/-</sup>*Ripk3*<sup>-/-</sup> mice: n=4). CD11b<sup>+</sup>Ly6G<sup>+</sup> cells were identified as neutrophils. **(d)** Flow cytometry and statistical results of CD4<sup>+</sup>, CD8<sup>+</sup> T cells and CD19<sup>+</sup>B220<sup>+</sup> B cells in spleen from *Ripk1*<sup>K376R/-</sup>*Ripk3*<sup>-/-</sup> and *Ripk1*<sup>K376R/+</sup>*Ripk3*<sup>-/-</sup> littermate mice at P40 (*Ripk1*<sup>K376R/+</sup>*Ripk3*<sup>-/-</sup> mice: n=4; *Ripk1*<sup>K376R/-</sup>*Ripk3*<sup>-/-</sup> mice: n=4). In **(a, c, d)**, data are mean  $\pm$  s.e.m. Statistical significance was determined using a two-tailed unpaired *t* test, ns *P* > 0.05.

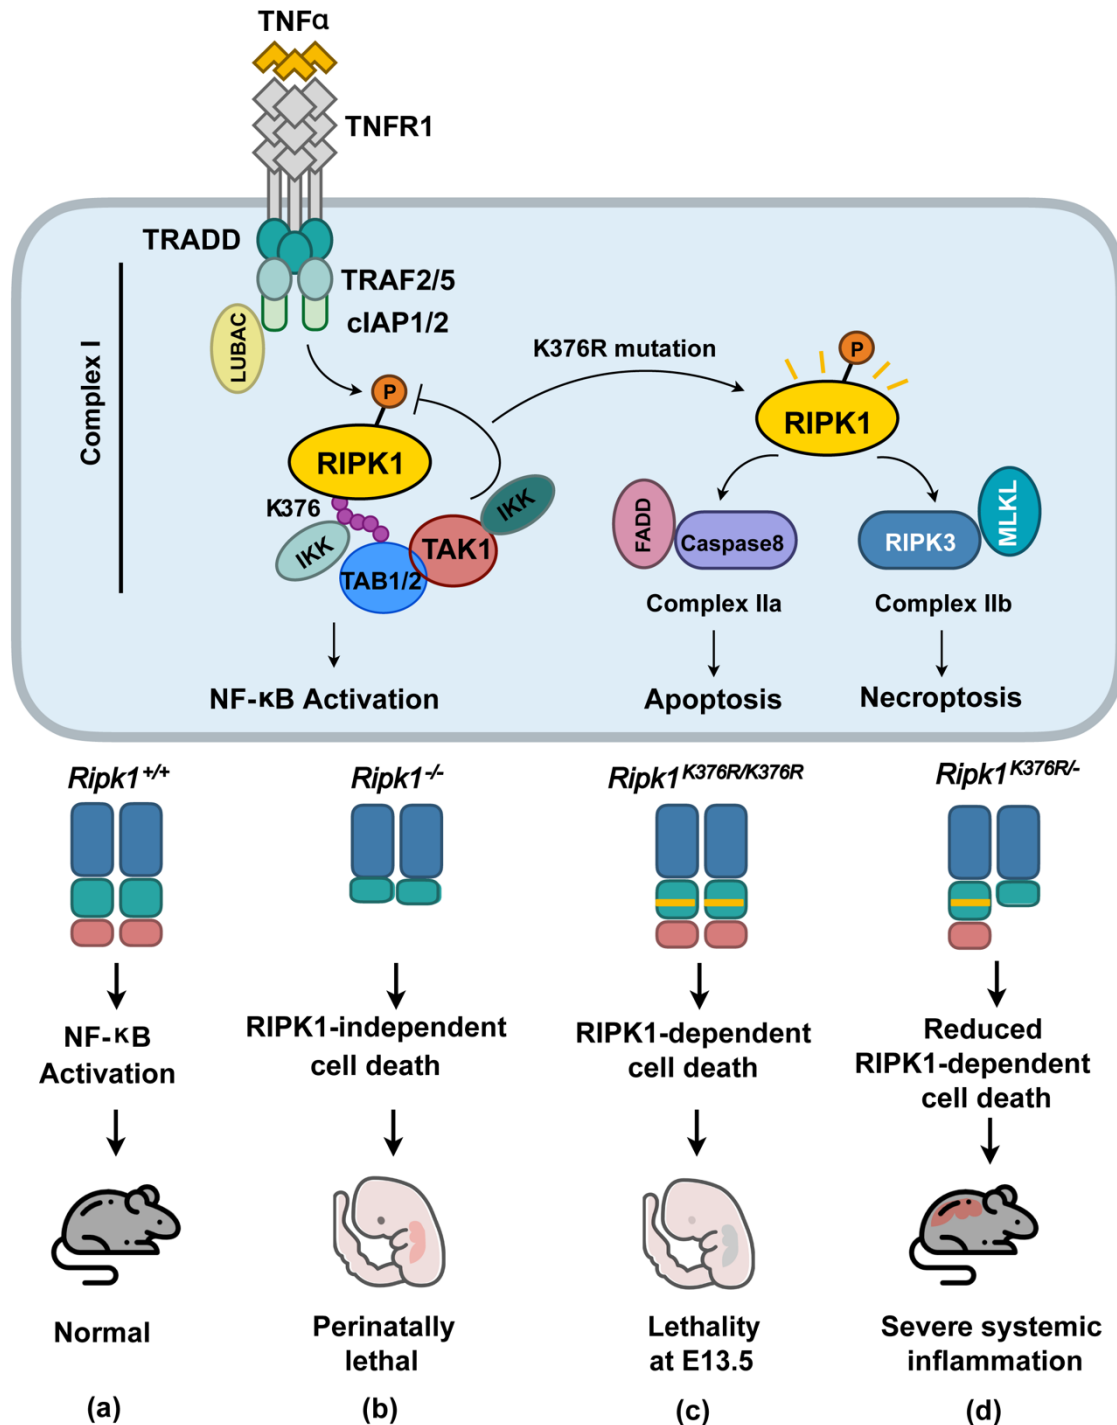

**Supplementary Figure 12. Proposed model that K63-linked ubiquitination of RIPK1 on K376 regulating TNF $\alpha$ -induced signaling**

(a) In normal condition, K63-linked ubiquitination of RIPK1 on K376 can recruit TAK1/IKK to suppress RIPK1 kinase activity, and also recruit IKK complex to promote NF- $\kappa$ B activation. These two signaling can both contribute to survival of *Ripk1*<sup>+/+</sup> mice. (b) Deficiency of RIPK1 can induce RIPK1-independent cell death, resulting in perinatally lethal of *Ripk1*<sup>-/-</sup> mice. (c) K376R mutation can enhance RIPK1 kinase activity to promote RIPK1-dependent cell death, resulting in embryonic lethality of *Ripk1*<sup>K376R/K376R</sup> mice at E13.5. (d) In *Ripk1*<sup>K376R/-</sup> cells,

RIPK1 kinase activity is relatively decreased comparing to *Ripk1*<sup>K376R/K376R</sup> cells, resulting in reduced RIPK1-dependent cell death, and *Ripk1*<sup>K376R/-</sup> could survive but develop severe systemic inflammation.

a

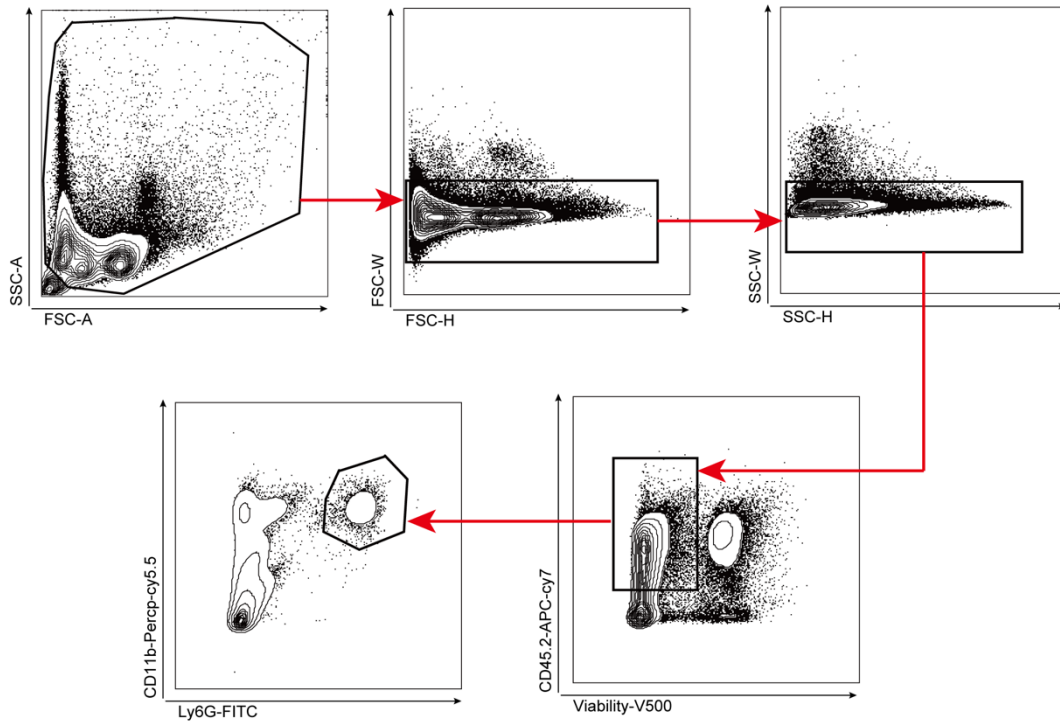

b

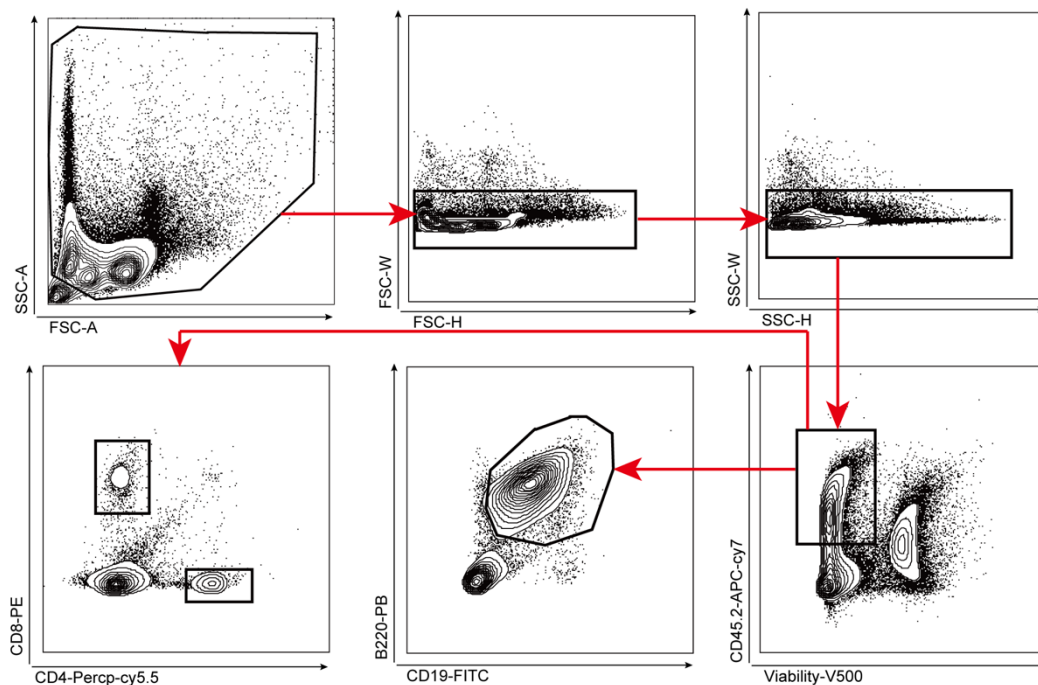

### Supplementary Figure 13. Hematopoietic gating strategy

(a) For characterization of spleen neutrophils, the living cell fractions gated from preliminary FSC/SSC gates could be further divided into CD45<sup>+</sup>CD11b<sup>+</sup>Ly6G<sup>+</sup> neutrophils. The

antibodies and fluorochrome used described as "Antibodies and reagents" in the methods.  
 (b) For characterization of spleen T cells, B cells, the living cell fractions gated from preliminary FSC/SSC gates could be further divided into three cell types: CD45+CD4+ T cells, CD45+CD8+ T cells, CD45+CD19+B220+ B cells. The antibodies and fluorochrome used described as "Antibodies and reagents" in the methods.

## Supplementary Table

**Table 1.** Primer sequences for generation of *Ripk1*<sup>K376R/K376R</sup> and *KD-Ripk1*<sup>-/-</sup> mice.

|                                              |                                                                                                                          |
|----------------------------------------------|--------------------------------------------------------------------------------------------------------------------------|
| sgRNA( <i>Ripk1</i> <sup>K376R/K376R</sup> ) | tgtgcaggctaagctgcaag                                                                                                     |
| Donor( <i>Ripk1</i> <sup>K376R/K376R</sup> ) | gtcctggtttctctccccagagtaccacaggacgagaatgatcgcagtggtgcaggccagactacag<br>gaagaagccagctatcatgcttttggaatattgcagagaaacagacaaa |
| sgRNA( <i>KD-Ripk1</i> <sup>-/-</sup> )      | gccctgtgataactttttc                                                                                                      |

**Table 2.** The primer sequences for genotyping-PCR.

| Gene                                       | Forward Primer (5'--3')  | Reverse Primer (5'--3') |
|--------------------------------------------|--------------------------|-------------------------|
| <b>Primer sequences for genotyping-PCR</b> |                          |                         |
| RIPK1 K376R WT                             | tgcaggctaagctgcaagag     | gtgctgggatcagaatgacc    |
| RIPK1 K376R KI                             | tgcaggccagactacaggaa     | gtgctgggatcagaatgacc    |
| RIPK1 ID-KO                                | ttctccccagagtaccac       | gtgctgggatcagaatgacc    |
| RIPK1 KD-KO                                | gtggagtacaagctagcctcagac | ctgtgttagccacacagatg    |

**Table 3.** The primer sequences for qRT-PCR.

| Gene                                | Forward Primer (5'--3') | Reverse Primer (5'--3') |
|-------------------------------------|-------------------------|-------------------------|
| <b>Primer sequences for qRT-PCR</b> |                         |                         |
| GAPDH                               | AACAGCAACTCCCCTCTTC     | CCTGTTGCTGTAGCCGTATT    |
| IL6                                 | TCCATCCAGTTGCCTTCTTG    | GGTCTGTTGGGAGTGGTATC    |
| TNF $\alpha$                        | CTACCTTGTTGCCTCCTCTTT   | GAGCAGAGGTTTCAGTGATGTAG |
| I $\kappa$ B $\alpha$               | TGAAGGACGAGGAGTACGAGC   | TTCGTGGATGATTGCCAAGTG   |
| CXCL1                               | CTGGGATTCACCTCAAGAACATC | CAGGGTCAAGGCAAGCCTC     |

|              |                         |                        |
|--------------|-------------------------|------------------------|
| CXCL2        | CCAACCACCAGGCTACAGG     | GCGTCACACTCAAGCTCTG    |
| IFN $\beta$  | CAGCTCCAAGAAAGGACGAAC   | GGCAGTGTA ACTCTTCTGCAT |
| IFN $\gamma$ | CTTTGGACCCTCTGACTTGAG   | TCAATGACTGTGCCGTGG     |
| A20          | ACAGTGGACCTGGTAAGAAAACA | CCTCCGTGACTGATGACAAGAT |
